# Supplementary material for: An Improved HPLC-DAD Method for Quantitative Comparisons of Triterpenes in Ganoderma lucidum and Its Five Related Species Originating from Vietnam
Source: MDPI journal article supplement (doi:10.3390/molecules20011059), 2015-01-09
Supplement: s1 [file s1]

## Supplementary Materials

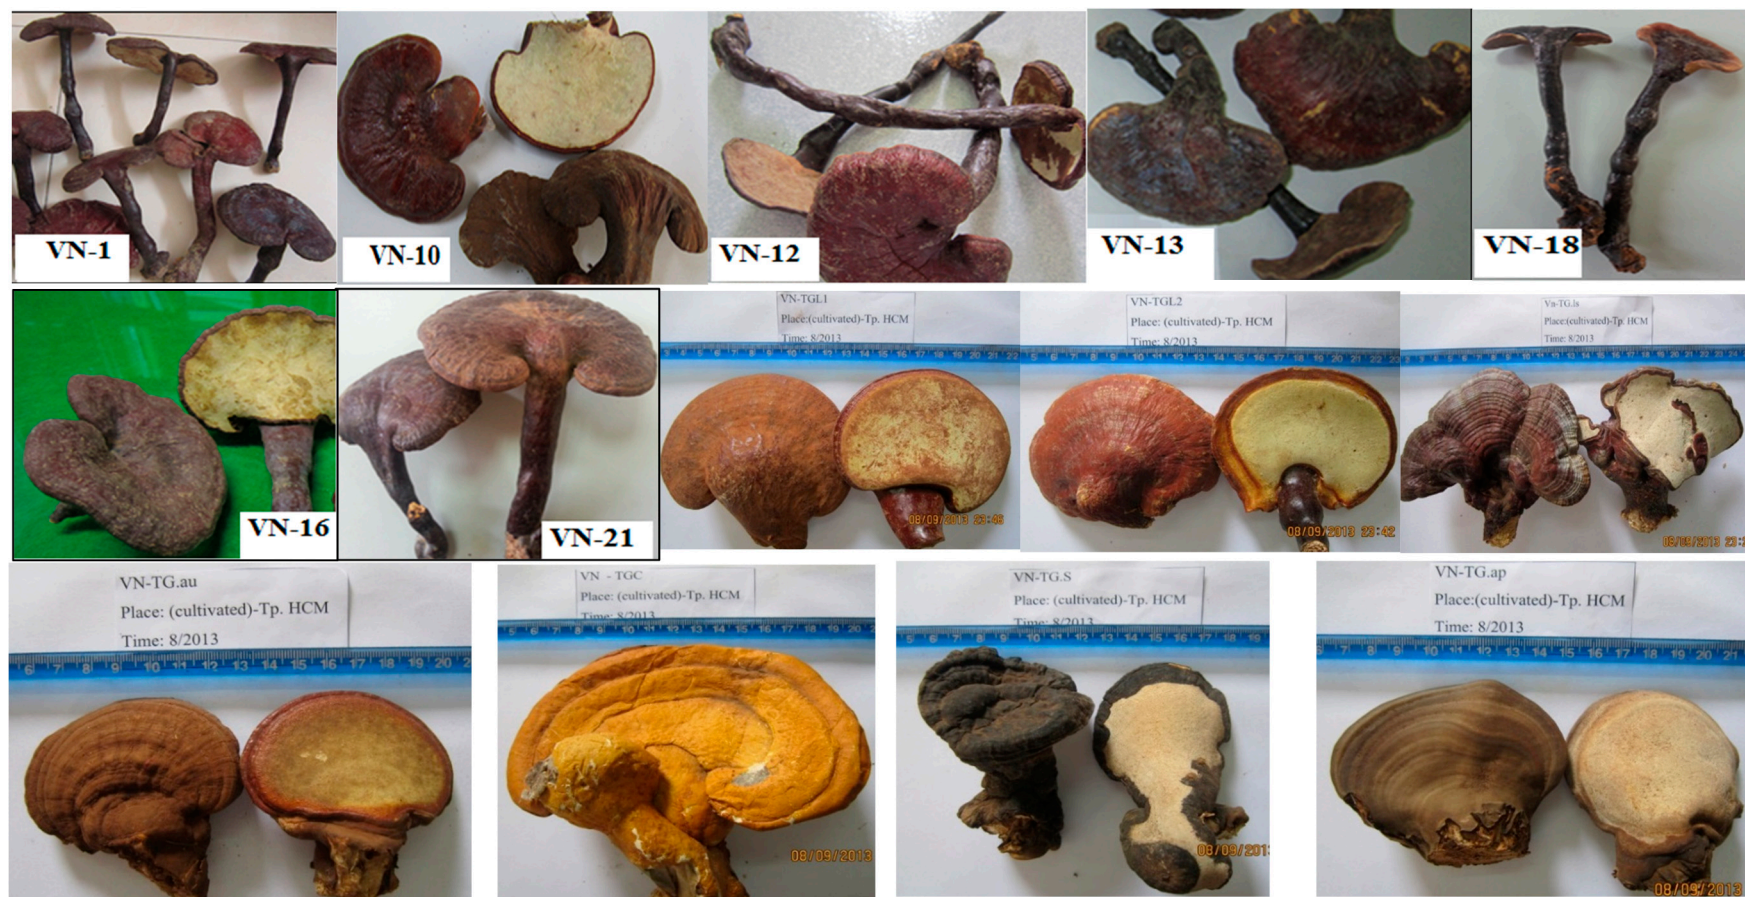

**Figure S1.** Pictures of Linzhzi and some related Linzhzi species.
